## References

1. Kienbaum P, Thürauf N, Michel MC, Scherbaum N, Gastpar M, Peters J: Profound increase in epinephrine concentration in plasma and cardiovascular stimulation after  $\mu$ -opioid receptor blockade in opioid-addicted patients during barbiturate-induced anesthesia for acute detoxification. *ANESTHESIOLOGY* 1998; 88:1154-61
2. Riordan CE, Kleber HD: Rapid opiate detoxification with clonidine and naltrexone. *Lancet* 1980; 1(8177):1079-80

3. Loimer N, Schmid R, Lenz K, Presslich O, Grünberger J: Acute blocking of naloxone precipitated opiate withdrawal symptoms by methohexitone. *Br J Psychiatry* 1990; 157:748-52
4. Legarda JJ, Gossop M: A 24-h inpatient detoxification treatment for heroin addicts: A preliminary investigation. *Drug Alcohol Depend* 1994; 35:91-3

(Accepted for publication September 17, 1998.)

Anesthesiology  
1999; 90:335  
© 1999 American Society of Anesthesiologists, Inc.  
Lippincott Williams & Wilkins

## Possible Mechanism(s) of Opioid-induced Coughing

*To the Editor:*—Doctors Bennett<sup>1</sup> and Yemen<sup>2</sup> recently exchanged letters addressing the issue of opioid-induced coughing. Doctor Yemen, in particular, expressed his curiosity as to the mechanism whereby opioids, known more as cough suppressants, could stimulate coughing. Dr. Yemen speculated that opioid-induced coughing might be related to opioid actions recently documented to occur at the level of the vocal cords.<sup>3</sup> I would like to bring to attention information not mentioned in their letters that is relevant to the question asked.

It is known that the antitussive actions of opioids are central in origin. However, fentanyl, and sufentanil and alfentanil, elicit a brief cough in up to 50% of patients when injected by intravenous bolus.<sup>4</sup> Opioid-induced coughing is elicited within seconds of drug injection. A pulmonary chemoreflex, mediated by C-fiber receptors (also known as J receptors), is thought to underlie this phenomenon.<sup>4</sup> Opioid receptors have been shown in smooth muscles of the trachea and bronchi and in alveolar walls, but not in the small airways.<sup>5</sup> Alveolar wall opioid receptors may be associated with J receptors.

The cough reflex after opioid injection is not likely to be vagally mediated because atropine pretreatment does not affect it.<sup>6</sup> Opioids may also elicit cough by stimulating irritant receptors in tracheal smooth muscle. Interestingly, pretreatment with inhaled  $\beta$ -adrenergic agonists significantly reduces the incidence of cough associated with intravenous opioid injection.<sup>6</sup>

In my experience, any opioid of the fentanyl series can elicit this usually brief cough response. Opioid-induced coughing is frequently more noticeable in patients who smoke. I have not witnessed an opioid-induced cough reflex that was not self-limited. As an aside, the elicitation of the cough reflex after opioid administration seems to be temporally related to circulation time and may serve as a clinical clue to "vein-to-brain" time, or cardiac output.

**Peter L. Bailey, M.D.**

Professor  
Department of Anesthesiology  
University of Utah  
Salt Lake City, Utah  
pbailey@anesth.med.utah.edu

## References

1. Bennett JA: Small doses of sufentanil will produce violent coughing in young children (reply to letter). *ANESTHESIOLOGY* 1998; 89:272
2. Yemen TA: Small doses of sufentanil will produce violent coughing in young children (letter). *ANESTHESIOLOGY* 1998; 89:271
3. Bennett J, Abrams J, Van Riper D, Horrow J: Difficult or impossible ventilation after sufentanil induction of anesthesia is caused primarily by vocal cord closure. *ANESTHESIOLOGY* 1997; 87:1070
4. Bohrer H, Fleischer F, Werning P: Tussive effect of a fentanyl bolus administered through a central venous catheter. *Anaesthesia* 1990; 45:18
5. Cabot P, Cramond T, Smith M: Quantitative autoradiography of peripheral opioid binding sites in rat lung. *Eur J Pharmacol* 1996; 310:47
6. Liu P, Hsing C, Chu Y: Terbutaline inhalation suppresses fentanyl induced coughing. *Can J Anesthesiol* 1996; 43:1216

(Accepted for publication August 24, 1998.)
